# Supplementary material for: Medicinal Plants in Traditional Herbal Wines and Liquors in the East of Spain and the Balearic Islands
Source: Front Pharmacol. 2021 Sep 29;12:713414. doi: 10.3389/fphar.2021.713414 (PMC8513779; doi:10.3389/fphar.2021.713414)
Supplement: Supplementary file 2 [file table1.xlsx]

## Sheet: Hoja1
Number of preparation	Type	Locality	Regional	Province	Dates	Number plant ingredients	Type of sample	Notes
1	Herbero	Banyeres de Mariola	Com. Valenciana	Alicante	2005-06-22	11	IB	I: Informant
2	Herbero	Banyeres de Mariola	Com. Valenciana	Alicante	2005-06-22	23	I	B: Bottle
3	Herbero	Banyeres de Mariola	Com. Valenciana	Alicante	2005-06-22	12	B	IB: informant+bottle
4	Herbero	Banyeres de Mariola	Com. Valenciana	Alicante	2005-06-22	11	IB	R: other
5	Herbero	Banyeres de Mariola	Com. Valenciana	Alicante	2005-06-22	17	I
6	Herbero	Banyeres de Mariola	Com. Valenciana	Alicante	2005-06-22	8	I
7	Herbero	Banyeres de Mariola	Com. Valenciana	Alicante	2005-06-22	16	B
8	Herbero	Banyeres de Mariola	Com. Valenciana	Alicante	2005-06-25	17	IB
9	Herbero	Banyeres de Mariola	Com. Valenciana	Alicante	2005-06-25	19	IB
10	Herbero	Banyeres de Mariola	Com. Valenciana	Alicante	2005-06-25	7	IB
11	Herbero	Banyeres de Mariola	Com. Valenciana	Alicante	2005-06-27	9	IB
12	Herbero	Banyeres de Mariola	Com. Valenciana	Alicante	2005-05-18	27	I
13	Herbero	Banyeres de Mariola	Com. Valenciana	Alicante	2005-05-18	27	I
14	Herbero	Banyeres de Mariola	Com. Valenciana	Alicante	2005-05-18	27	I
15	Herbero	Banyeres de Mariola	Com. Valenciana	Alicante	2005-05-18	27	I
16	Herbero	Banyeres de Mariola	Com. Valenciana	Alicante	2005-06-27	15	B
17	Herbero	Banyeres de Mariola	Com. Valenciana	Alicante	2005-06-27	15	B
18	Herbero	Bocairent	Com. Valenciana	Valencia	2005-06-27	9	IB
19	Herbero	Bocairent	Com. Valenciana	Valencia	2005-06-27	13	I
20	Herbero	Bocairent	Com. Valenciana	Valencia	2005-06-27	6	I
21	Herbero	Bocairent	Com. Valenciana	Valencia	2005-06-27	15	B
22	Herbero	Bocairent	Com. Valenciana	Valencia	2005-06-27	7	B
23	Herbero	Alfafara	Com. Valenciana	Alicante	2007-06-20	11	B
24	Herbero	Alfafara	Com. Valenciana	Alicante	2007-06-20	7	I
25	Herbero	Alfafara	Com. Valenciana	Alicante	2007-06-20	7	I
26	Herbero	Alfafara	Com. Valenciana	Alicante	20/0&/2007	10	I
27	Herbero	Agres	Com. Valenciana	Alicante	2007-06-20	11	I
28	Herbero	Agres	Com. Valenciana	Alicante	2007-06-20	11	I
29	Herbero	Agres	Com. Valenciana	Alicante	2007-06-20	11	I
30	Herbero	Agres	Com. Valenciana	Alicante	2007-06-20	11	I
31	Herbero	Agres	Com. Valenciana	Alicante	2007-06-20	20	I
32	Herbero	Benilloba	Com. Valenciana	Alicante	2007-06-22	10	I
33	Herbero	Bocairent	Com. Valenciana	Valencia	2007-07-02	13	I
34	Herbero	Bocairent	Com. Valenciana	Valencia	2007-07-02	13	I
35	Herbero	Bocairent	Com. Valenciana	Valencia	2007-07-02	13	I
36	Herbero	Bocairent	Com. Valenciana	Valencia	2007-07-02	13	I
37	Herbero	Cocentaina	Com. Valenciana	Alicante	2007-07-10	3	I
38	Walnut wine	Artana	Com. Valenciana	Castellón	2007-07-26	1	I
39	Walnut wine	Artana	Com. Valenciana	Castellón	2007-07-26	1	I
40	Fruit spirit	Villanueva de Vivers	Com. Valenciana	Castellón	2007-07-27	1	I
41	Absinthe	Pavías	Com. Valenciana	Castellón	2007-07-27	1	I
42	Spirit	Pavías	Com. Valenciana	Castellón	2007-07-27	1	I
43	Spirit	Pavías	Com. Valenciana	Castellón	2007-07-27	1	I
44	Spirit	Pavías	Com. Valenciana	Castellón	2007-07-27	2	I
45	Fruit Spirit	Pavías	Com. Valenciana	Castellón	2007-07-27	1	I
46	Fruit Spirit	Pavías	Com. Valenciana	Castellón	2007-07-27	4	I
47	Herbal wine	Llucena del Cid	Com. Valenciana	Castellón	2007-07-28	1	I
48	Walnut wine	Llucena del Cid	Com. Valenciana	Castellón	2007-07-28	1	I
49	Spirit	Llucena del Cid	Com. Valenciana	Castellón	2007-07-28	1	I
50	Spirit	Llucena del Cid	Com. Valenciana	Castellón	2007-07-28	1	I
51	Gitam	Morella	Com. Valenciana	Castellón	2007-07-29	1	I
52	Herbal spirit	Morella	Com. Valenciana	Castellón	2007-07-29	1	I
53	Wine	Morella	Com. Valenciana	Castellón	2007-07-29	2	I
54	Herbero	Morella	Com. Valenciana	Castellón	2007-07-29	6	I
55	Walnut wine	Ares del Maestrat	Com. Valenciana	Castellón	2007-07-29	1	I
56	Fruit spirit	Ares del Maestrat	Com. Valenciana	Castellón	2007-07-29	1	I
57	Fruit spirit	Ares del Maestrat	Com. Valenciana	Castellón	2007-07-29	2	I
58	Fruit spirit	Ares del Maestrat	Com. Valenciana	Castellón	2007-07-29	1	I
59	Fruit spirit	Ares del Maestrat	Com. Valenciana	Castellón	2007-07-29	2	I
60	Gitam	Castellfort	Com. Valenciana	Castellón	2007-07-29	1	I
61	Gitam	Castellfort	Com. Valenciana	Castellón	2007-07-29	1	I
62	Gitam	Morella	Com. Valenciana	Castellón	2007-07-30	1	I
63	Gitam	Morella	Com. Valenciana	Castellón	2007-07-30	2	I
64	Vermouth	Morella	Com. Valenciana	Castellón	2007-07-30	2	I
65	Gitam	Morella	Com. Valenciana	Castellón	2007-07-30	1	I
66	Fruit spirit	Morella	Com. Valenciana	Castellón	2007-07-30	1	I
67	Fruit spirit	Morella	Com. Valenciana	Castellón	2007-07-30	3	I
68	Mushroom spirit	Morella	Com. Valenciana	Castellón	2007-07-30	1	I
69	Gitam	Forcall	Com. Valenciana	Castellón	2007-07-30	1	I
70	Walnut wine	Forcall	Com. Valenciana	Castellón	2007-07-30	1	I
71	Fruit spirit	Forcall	Com. Valenciana	Castellón	2007-07-30	1	I
72	Fruit wine	Forcall	Com. Valenciana	Castellón	2007-07-30	1	I
73	Fruit Spirit	Xorrit de Morella	Com. Valenciana	Castellón	2007-07-30	1	I
74	Absinthe	Xorrit de Morella	Com. Valenciana	Castellón	2007-07-30	1	I
75	Herbal wine	Xorrit de Morella	Com. Valenciana	Castellón	2007-07-30	1	I
76	Gitam	Pobla de Benifassà	Com. Valenciana	Castellón	2007-07-31	1	I
77	Absinthe	Pobla de Benifassà	Com. Valenciana	Castellón	2007-07-31	1	I
78	Fruit spirit	Pobla de Benifassà	Com. Valenciana	Castellón	2007-07-31	1	I
79	Fruit Spirit	Pobla de Benifassà	Com. Valenciana	Castellón	2007-07-31	1	I
80	Fruit Spirit	Pobla de Benifassà	Com. Valenciana	Castellón	2007-07-31	1	I
81	Fruit Spirit	Pobla de Benifassà	Com. Valenciana	Castellón	2007-07-31	1	I
82	Walnut wine	El Boixar	Com. Valenciana	Castellón	2007-07-31	1	I
83	Vermouth	El Boixar	Com. Valenciana	Castellón	2007-07-31	2	IB
84	Gitam	El Boixar	Com. Valenciana	Castellón	2007-07-31	1	IB
85	Gitam	Pobla de Vallbona	Com. Valenciana	Valencia	2007-07-31	1	I
86	Vermouth	Pobla de Vallbona	Com. Valenciana	Valencia	2007-07-31	1	I
87	Gitam	El Ballestar	Com. Valenciana	Castellón	2007-07-31	1	I
88	Gitam	El Ballestar	Com. Valenciana	Castellón	2007-07-31	5	I
89	Spirit	El Ballestar	Com. Valenciana	Castellón	2007-07-31	1	I
90	Vermouth	El Ballestar	Com. Valenciana	Castellón	2007-07-31	1	I
91	Gitam	Fredes	Com. Valenciana	Castellón	2007-07-31	1	I
92	Fruit spirit	Fredes	Com. Valenciana	Castellón	2007-07-31	3	I
93	Gitam	La Sènia	Cataluña	Tarragona	2007-07-31	1	I
94	Fruit spirit	La Jana	Com. Valenciana	Castellón	2007-07-31	3	I
95	Walnut wine	La Jana	Com. Valenciana	Castellón	2007-07-31	1	I
96	Herbal Spirit	Alfondeguilla	Com. Valenciana	Castellón	2007-08-09	1	I
97	Fruit Spirit	Alfondeguilla	Com. Valenciana	Castellón	2007-08-09	1	I
98	Fruit Spirit	Alfondeguilla	Com. Valenciana	Castellón	2007-08-09	1	I
99	Beatamaria	Horta de Sant Joan	Cataluña	Tarragona	2007-08-09	6	I
100	Gitam	Horta de Sant Joan	Cataluña	Tarragona	2007-08-09	1	I
101	Beatamaria	Horta de Sant Joan	Cataluña	Tarragona	2007-08-09	9	I
102	Spirit	Horta de Sant Joan	Cataluña	Tarragona	2007-08-09	1	I
103	Gitam	Ràfales	Aragón	Teruel	2007-08-10	1	I
104	Herbal Spirit	Ràfales	Aragón	Teruel	2007-08-10	1	I
105	Herbal Spirit	Ràfales	Aragón	Teruel	2007-08-10	2	I
106	Walnut wine	Ràfales	Aragón	Teruel	2007-08-10	1	I
107	Fruit wine	Ràfales	Aragón	Teruel	2007-08-10	1	I
108	Fruit wine	Ràfales	Aragón	Teruel	2007-08-10	1	I
109	Wine	Ràfales	Aragón	Teruel	2007-08-10	1	I
110	Walnut wine	Queretes	Aragón	Teruel	2007-08-10	1	I
111	Gitam	Queretes	Aragón	Teruel	2007-08-10	1	I
112	Beatamaria	Queretes	Aragón	Teruel	2007-08-10	1	IB
113	Beatamaria	Beceit	Aragón	Teruel	2007-08-11	3	I
114	Vermouth	Beceit	Aragón	Teruel	2007-08-11	1	I
115	Wine	Beceit	Aragón	Teruel	2007-08-11	1	I
116	Gitam	Calaceit	Aragón	Teruel	2007-08-11	1	I
117	Gitam	Calaceit	Aragón	Teruel	2007-08-11	1	I
118	Beatamaria	Calaceit	Aragón	Teruel	2007-08-11	1	I
119	Gitam	Forcall	Com. Valenciana	Castellón	2007-08-12	1	I
120	Walnut wine	Forcall	Com. Valenciana	Castellón	2007-08-12	1	I
121	Fruit spirit	Forcall	Com. Valenciana	Castellón	2007-08-12	3	I
122	Gitam	Forcall	Com. Valenciana	Castellón	2007-08-12	1	I
123	Walnut wine	Forcall	Com. Valenciana	Castellón	2007-08-12	1	I
124	Gitam	Herbés	Com. Valenciana	Castellón	2007-08-14	1	I
125	Fruit spirit	Herbés	Com. Valenciana	Castellón	2007-08-14	2	I
126	Gitam	Herbés	Com. Valenciana	Castellón	2007-08-14	1	I
127	Beatamaria	Herbés	Com. Valenciana	Castellón	2007-08-14	1	I
128	Fruit Spirit	Herbés	Com. Valenciana	Castellón	2007-08-14	1	I
129	Fruit spirit	Herbés	Com. Valenciana	Castellón	2007-08-14	2	I
130	Wine	Herbés	Com. Valenciana	Castellón	2007-08-14	1	I
131	Walnut wine	Herbés	Com. Valenciana	Castellón	2007-08-14	1	I
132	Cucumber spirit	Herbés	Com. Valenciana	Castellón	2007-08-14	1	I
133	Walnut wine	La Fresneda	Aragón	Teruel	2007-08-14	1	I
134	Gitam	La Fresneda	Aragón	Teruel	2007-08-14	1	I
135	Herbal wine	La Fresneda	Aragón	Teruel	2007-08-14	1	I
136	Fruit spirit	La Fresneda	Aragón	Teruel	2007-08-14	1	I
137	Fruit spirit	La Fresneda	Aragón	Teruel	2007-08-14	1	I
138	Cucumber spirit	La Fresneda	Aragón	Teruel	2007-08-14	1	I
139	Herbero	Benifato	Com. Valenciana	Alicante	2008-02-02	19	IB
140	Herbero	Banyeres de Mariola	Com. Valenciana	Alicante	2010-05-30	16	B
141	Herbero	Banyeres de Mariola	Com. Valenciana	Alicante	2010-06-04	11	IB
142	Herbero	Banyeres de Mariola	Com. Valenciana	Alicante	2010-06-04	13	I
143	Herbero	Xixona	Com. Valenciana	Alicante	2009-12-15	9	I
144	Herbero	Xixona	Com. Valenciana	Alicante	2009-12-15	9	I
145	Herbero	Xixona	Com. Valenciana	Alicante	2009-12-15	11	IB
146	Herbero	Sant Carles de la Ràpita	Cataluña	Tarragona	2009-12-18	17	IB
147	Herbero	Sant Carles de la Ràpita	Cataluña	Tarragona	2009-12-18	11	I
148	Herbero	Sant Carles de la Ràpita	Cataluña	Tarragona	2009-12-18	13	I
149	Herbal spirit	Sant Carles de la Ràpita	Cataluña	Tarragona	2009-12-18	2	I
150	Herbal Spirit	Sant Carles de la Ràpita	Cataluña	Tarragona	2009-12-18	1	I
151	Herbero	Santa Gertrudis	Baleares	Ibiza	2016-06-03	18	I
152	Herbero	Sant Carles de la Ràpita	Cataluña	Tarragona	2009-12-18	15	I
153	Herbero	Sant Joan de Labritja	Baleares	Ibiza	2009-12-18	6	IB
154	Herbero	Sant Joan de Labritja	Baleares	Ibiza	2009-12-18	7	IB
155	Herbero	Sant Antoni de Portmany	Baleares	Ibiza	2009-12-19	7	I
156	Herbero	Sant Antoni de Portmany	Baleares	Ibiza	2009-12-19	8	I
157	Herbero	Sant Antoni de Portmany	Baleares	Ibiza	2009-12-19	7	I
158	Herbero	Sant Agustí	Baleares	Ibiza	2009-12-19	9	I
159	Herbero	Cocentaina	Com. Valenciana	Alicante	2006-11-05	7	I
160	Herbero	Cocentaina	Com. Valenciana	Alicante	2006-11-05	7	I
161	Herbero	Cocentaina	Com. Valenciana	Alicante	2006-11-05	7	I
162	Herbero	Cocentaina	Com. Valenciana	Alicante	2006-11-05	7	I
163	Herbero	Selva	Baleares	Mallorca	2008-05-04	47	IB
164	Walnut wine	Selva	Baleares	Mallorca	2008-05-03	1	I
165	Fruit spirit	Consorci de Gallecs	Cataluña	Barcelona	2008-05-04	1	I
166	Fruit spirit	Consorci de Gallecs	Cataluña	Barcelona	2008-05-04	1	I
167	Cucumber spirit	Consorci de Gallecs	Cataluña	Barcelona	2008-05-04	1	I
168	Fruit spirit	Consorci de Gallecs	Cataluña	Barcelona	2008-05-04	1	I
169	Herbero	Mallorca	Baleares	Mallorca	2008-05-04	8	IB
170	Fruit spirit	Villena	Com. Valenciana	Alicante	2008-05-08	1	IB
171	Spirit	Villena	Com. Valenciana	Alicante	2008-05-08	3	IB
172	Absinthe	Villena	Com. Valenciana	Alicante	2008-05-08	1	IB
173	Cantueso	Villena	Com. Valenciana	Alicante	2008-05-08	1	IB
174	Herbero	Villena	Com. Valenciana	Alicante	2008-05-08	8	IB
175	Herbero	Selva	Baleares	Mallorca	2008-05-05	22	I
176	Herbero	Llubí	Baleares	Mallorca	2008-05-05	7	I
177	Herbero	Selva	Baleares	Mallorca	2008-06-09	43	I
178	Fruit spirit	Selva	Baleares	Mallorca	2008-06-09	1	I
179	Fruit spirit	Selva	Baleares	Mallorca	2008-06-09	1	I
180	Walnut wine	Selva	Baleares	Mallorca	2008-06-09	1	I
181	Fruit spirit	Selva	Baleares	Mallorca	2008-06-09	2	I
182	Fruit Spirit	Benálcazar, Córdoba	Andalucia	Córdoba	2007-03-24	1	I
183	Absinthe	Valencia	Com. Valenciana	Valencia	2007-03-24	1	I
184	Absinthe	Valencia	Com. Valenciana	Valencia	2007-03-24	2	I
185	Honey spirit	Ayora	Com. Valenciana	Valencia	2007-03-24	2	I
186	Fruit spirit	Ayora	Com. Valenciana	Valencia	2007-03-24	1	I
187	Honey spirit	Ayora	Com. Valenciana	Valencia	2007-03-24	1	I
188	Honey spirit	Ayora	Com. Valenciana	Valencia	2007-03-24	1	I
189	Spirit	Ayora	Com. Valenciana	Valencia	2007-03-24	1	I
190	Cucumber spirit	Ayora	Com. Valenciana	Valencia	2007-03-24	1	I
191	Herbero	Enguera	Com. Valenciana	Valencia	2007-03-24	6	I
192	Herbero	Vallonga, Pedanía de Elche	Com. Valenciana	Alicante	2007-03-31	11	IB
193	Herbero	Vallonga, Pedanía de Elche	Com. Valenciana	Alicante	2007-03-31	10	IB
194	Herbero	Vallonga, Pedanía de Elche	Com. Valenciana	Alicante	2007-03-31	13	IB
195	Herbero	Alcoi	Com. Valenciana	Alicante	2007-04-06	1	IB
196	Fruit spirit	Carcaixent	Com. Valenciana	Valencia	2007-04-09	2	I
197	Fruit spirit	Carcaixent	Com. Valenciana	Valencia	2007-04-09	2	I
198	Fruit spirit	Carcaixent	Com. Valenciana	Valencia	2007-04-09	2	I
199	Fruit spirit	Carcaixent	Com. Valenciana	Valencia	2007-04-09	3	I
200	Absinthe	Barraca d'Aigües Vives	Com. Valenciana	Valencia	2007-04-08	2	I
201	Spirit	Simat de la Valldigna	Com. Valenciana	Valencia	2007-04-09	1	I
202	Fruit spirit	Simat de la Valldigna	Com. Valenciana	Valencia	2007-04-09	3	I
203	Fruit spirit	Simat de la Valldigna	Com. Valenciana	Valencia	2007-04-09	2	I
204	Fruit spirit	Pego	Com. Valenciana	Alicante	2007-04-09	2	I
205	Herbero	Pego	Com. Valenciana	Alicante	2007-04-10	7	I
206	Absinthe	Pego	Com. Valenciana	Alicante	2007-04-10	2	I
207	Spirit	Pego	Com. Valenciana	Alicante	2007-04-10	1	I
208	Spirit	Pego	Com. Valenciana	Alicante	2007-04-10	1	I
209	Fruit spirit	Pego	Com. Valenciana	Alicante	2007-04-10	1	I
210	Herbal Spirit	Pego	Com. Valenciana	Alicante	2007-04-10	1	I
211	Absinthe	Pego	Com. Valenciana	Alicante	2007-04-10	4	I
212	Absinthe	Pego	Com. Valenciana	Alicante	2007-04-10	3	I
213	Herbero	Benissili	Com. Valenciana	Alicante	2007-04-10	10	I
214	Herbero	Benissili	Com. Valenciana	Alicante	2007-04-10	7	I
215	Absinthe	Ondara	Com. Valenciana	Alicante	2007-04-11	1	I
216	Spirit	Ondara	Com. Valenciana	Alicante	2007-04-11	1	I
217	Absinthe	Orba	Com. Valenciana	Alicante	2007-04-11	1	I
218	Spirit	Orba	Com. Valenciana	Alicante	2007-04-11	1	I
219	Fruit Spirit	Orba	Com. Valenciana	Alicante	2007-04-11	1	I
220	Herbal spirit	Orba	Com. Valenciana	Alicante	2007-04-11	1	I
221	Absinthe	Orba	Com. Valenciana	Alicante	2007-04-11	2	I
222	Spirit	Orba	Com. Valenciana	Alicante	2007-04-11	1	I
223	Cantueso	El Rodriguillo	Com. Valenciana	Alicante	2007-04-16	1	I
224	Cantueso	El Rodriguillo	Com. Valenciana	Alicante	2007-04-16	1	I
225	Cantueso	El Rodriguillo	Com. Valenciana	Alicante	2007-04-16	1	I
226	Herbero	Raspay	Reg. Murcia	Murcia	2007-04-16	4	IB
227	Gitam	Raspay	Reg. Murcia	Murcia	2007-04-16	1	IB
228	Cantueso	Raspay	Reg. Murcia	Murcia	2007-04-16	1	I
229	Fruit spirit	El Rodriguillo	Com. Valenciana	Alicante	2007-04-16	1	I
230	Spirit	Libros	Aragón	Teruel	2007-04-17	1	I
231	Beatamaria	Vallderroures	Aragón	Teruel	2007-04-18	1	IB
232	Gitam	Vallderroures	Aragón	Teruel	2007-04-18	1	IB
233	Fruit spirit	Vallderroures	Aragón	Teruel	2007-04-18	1	I
234	Gitam	Beceit	Aragón	Teruel	2007-04-18	1	I
235	Beatamaria	Beceit	Aragón	Teruel	2007-04-18	2	I
236	Gitam	Lledó	Aragón	Teruel	2007-04-18	1	I
237	Beatamaria	Lledó	Aragón	Teruel	2007-04-18	1	I
238	Beatamaria	Horta de Sant Joan	Cataluña	Tarragona	2007-04-18	1	I
239	Spirit	Horta de Sant Joan	Cataluña	Tarragona	2007-04-18	1	IB
240	Beatamaria	Horta de Sant Joan	Cataluña	Tarragona	2007-04-18	1	IB
241	Beatamaria	Horta de Sant Joan	Cataluña	Tarragona	2007-04-18	3	IB
242	Beatamaria	Horta de Sant Joan	Cataluña	Tarragona	2007-04-18	7	IB
243	Gitam	Horta de Sant Joan	Cataluña	Tarragona	2007-04-18	1	IB
244	Beatamaria	Horta de Sant Joan	Cataluña	Tarragona	2007-04-18	1	IB
245	Gitam	Vallderroures	Aragón	Teruel	2007-04-19	1	I
246	Beatamaria	Vallderroures	Aragón	Teruel	2007-04-19	1	I
247	Gitam	Castellfort	Com. Valenciana	Castellón	2007-04-19	1	I
248	Gitam	Fuentespalda	Aragón	Teruel	2007-04-19	1	I
249	Fruit spirit	Vallderroures	Aragón	Teruel	2007-04-19	1	I
250	Gitam	Vallderroures	Aragón	Teruel	2007-04-19	1	I
251	Beatamaria	Vallderroures	Aragón	Teruel	2007-04-19	1	I
252	Walnut wine	Vallderroures	Aragón	Teruel	2007-04-19	1	I
253	Fruit Spirit	Vallderroures	Aragón	Teruel	2007-04-19	1	I
254	Absinthe	Vallderroures	Aragón	Teruel	2007-04-19	1	I
255	Gitam	Penyarroya de Tastavins	Aragón	Teruel	2007-04-20	1	I
256	Gitam	Monroyo	Aragón	Teruel	2007-04-20	1	I
257	Spirit	Xiva de Morella	Com. Valenciana	Castellón	2007-04-20	1	I
258	Gitam	Xiva de Morella	Com. Valenciana	Castellón	2007-04-20	2	I
259	Spirit	Xiva de Morella	Com. Valenciana	Castellón	2007-04-20	1	I
260	Gitam	Cinctorres	Com. Valenciana	Castellón	2007-04-20	1	I
261	Gitam	Castellfort	Com. Valenciana	Castellón	2007-04-20	1	I
262	Spirit	Castellfort	Com. Valenciana	Castellón	2007-04-20	1	I
263	Spirit	Alcúdia de Veo	Com. Valenciana	Castellón	2007-04-21	1	IB
264	Wine	Alcúdia de Veo	Com. Valenciana	Castellón	2007-04-21	1	IB
265	Herbal Spirit	Alcúdia de Veo	Com. Valenciana	Castellón	2007-04-21	1	I
266	Fruit Spirit	Alcúdia de Veo	Com. Valenciana	Castellón	2007-04-21	1	I
267	Fruit Spirit	Alcúdia de Veo	Com. Valenciana	Castellón	2007-04-21	1	I
268	Cantueso	Alacant	Com. Valenciana	Alicante	2007-05-01	1	IB
269	Herbero	Banyeres de Mariola	Com. Valenciana	Alicante	2007-05-01	17	I
270	Herbero	Banyeres de Mariola	Com. Valenciana	Alicante	2007-05-01	18	I
271	Herbero	Banyeres de Mariola	Com. Valenciana	Alicante	2007-05-01	17	I
272	Herbero	Banyeres de Mariola	Com. Valenciana	Alicante	2007-05-01	7	I
273	Walnut wine	Banyeres de Mariola	Com. Valenciana	Alicante	2007-05-01	2	I
274	Herbal Spirit	Banyeres de Mariola	Com. Valenciana	Alicante	2007-05-01	1	I
275	Fruit spirit	Banyeres de Mariola	Com. Valenciana	Alicante	2007-05-01	3	I
276	Fruit spirit	Banyeres de Mariola	Com. Valenciana	Alicante	2007-05-01	3	I
277	Herbero	Cocentaina	Com. Valenciana	Alicante	2007-06-13	7	I
278	Cantueso	Elx	Com. Valenciana	Alicante	2007-05-17	1	IB
279	Herbero	Elx	Com. Valenciana	Alicante	2007-05-17	5	IB
280	Cantueso	Elx	Com. Valenciana	Alicante	2007-05-17	1	I
281	Herbero	Elx	Com. Valenciana	Alicante	2007-05-17	9	I
282	Herbero	Elx	Com. Valenciana	Alicante	2007-05-17	8	I
283	Wine	Elx	Com. Valenciana	Alicante	2007-05-17	1	I
284	Fruit spirit	Elx	Com. Valenciana	Alicante	2007-05-17	1	I
285	Herbero	Elx	Com. Valenciana	Alicante	2007-05-17	12	I
286	Fruit spirit	Cocentaina	Com. Valenciana	Alicante	2007-05-26	1	I
287	Fruit Spirit	Cocentaina	Com. Valenciana	Alicante	2007-05-26	2	I
288	Fruit Spirit	Cocentaina	Com. Valenciana	Alicante	2007-05-26	2	I
289	Fruit spirit	Cocentaina	Com. Valenciana	Alicante	2007-05-26	1	I
290	Fruit spirit	Cocentaina	Com. Valenciana	Alicante	2007-05-26	2	I
291	Cantueso	Sella	Com. Valenciana	Alicante	2007-05-27	1	I
292	Herbero	Sella	Com. Valenciana	Alicante	2007-05-27	7	I
293	Herbero	Tàrbena	Com. Valenciana	Alicante	2007-05-26	14	IB
294	Herbero	Muro d'Alcoi	Com. Valenciana	Alicante	2007-06-02	1	IB
295	Herbero	Muro d'Alcoi	Com. Valenciana	Alicante	2007-06-02	9	I
296	Herbero	Muro d'Alcoi	Com. Valenciana	Alicante	2007-06-02	9	I
297	Herbal spirit	Muro d'Alcoi	Com. Valenciana	Alicante	2007-06-02	1	I
298	Cantueso	Muro d'Alcoi	Com. Valenciana	Alicante	2007-06-02	1	I
299	Cucumber spirit	La Torre de les Maçanes	Com. Valenciana	Alicante	2007-06-02	1	IB
300	Herbero	La Torre de les Maçanes	Com. Valenciana	Alicante	2007-06-02	7	IB
301	Herbero	La Torre de les Maçanes	Com. Valenciana	Alicante	2007-06-02	8	I
302	Cantueso	La Torre de les Maçanes	Com. Valenciana	Alicante	2007-06-02	1	I
303	Herbero	Relleu	Com. Valenciana	Alicante	2007-06-02	6	I
304	Herbero	Cocentaina	Com. Valenciana	Alicante	2007-06-04	7	IB
305	Herbero	Cocentaina	Com. Valenciana	Alicante	2007-06-04	7	I
306	Herbero	Cocentaina	Com. Valenciana	Alicante	2007-06-04	7	I
307	Herbero	Cocentaina	Com. Valenciana	Alicante	2007-06-04	7	I
308	Herbero	Cocentaina	Com. Valenciana	Alicante	2007-06-04	7	IB
309	Herbero	Cocentaina	Com. Valenciana	Alicante	2007-06-04	9	I
310	Walnut wine	Cocentaina	Com. Valenciana	Alicante	2007-06-04	2	IB
311	Cantueso	Cocentaina	Com. Valenciana	Alicante	2007-06-04	1	I
312	Fruit Spirit	Cocentaina	Com. Valenciana	Alicante	2007-06-04	1	I
313	Herbero	Cocentaina	Com. Valenciana	Alicante	2007-06-04	9	I
314	Herbero	Cocentaina	Com. Valenciana	Alicante	2007-06-04	2	I
315	Herbero	Benimarfull	Com. Valenciana	Alicante	2007-06-10	5	I
316	Herbero	Benimarfull	Com. Valenciana	Alicante	2007-06-10	1	IB
317	Herbero	Planes	Com. Valenciana	Alicante	2007-06-10	1	IB
318	Spirit	Castelló del Rugat	Com. Valenciana	Valencia	2007-06-10	1	I
319	Absinthe	Castelló del Rugat	Com. Valenciana	Valencia	2007-06-10	1	I
320	Herbero	Ibi	Com. Valenciana	Alicante	2007-06-12	10	I
321	Herbal wine	Caudiel	Com. Valenciana	Castellón	2007-07-27	1	I
322	Walnut wine	Gea de Albarracín	Aragón	Teruel	2007-07-27	1	I
323	Herbero	Ibi	Com. Valenciana	Alicante	2007-02-09	7	I
324	Herbero	Ibi	Com. Valenciana	Alicante	2007-02-09	7	I
325	Herbero	Ibi	Com. Valenciana	Alicante	2007-02-09	7	I
326	Herbero	Ibi	Com. Valenciana	Alicante	2007-02-09	9	IB
327	Herbal spirit	Ibi	Com. Valenciana	Alicante	2007-02-09	1	IB
328	Herbal spirit	Ibi	Com. Valenciana	Alicante	2007-02-09	2	IB
329	Walnut wine	Ibi	Com. Valenciana	Alicante	2007-02-09	3	IB
330	Fruit spirit	Ibi	Com. Valenciana	Alicante	2007-02-09	3	IB
331	Absinthe	Beneixama	Com. Valenciana	Alicante	2007-02-16	1	I
332	Cantueso	Beneixama	Com. Valenciana	Alicante	2007-02-16	1	I
333	Fruit spirit	Beneixama	Com. Valenciana	Alicante	2007-02-16	2	I
334	Fruit spirit	Nerpio	Castilla-La Mancha	Albacete	2007-02-11	1	IB
335	Walnut wine	Nerpio	Castilla-La Mancha	Albacete	2007-02-11	1	IB
336	Honey spirit	La Puebla de don Fadrique	Andalucia	Granada	2007-02-11	1	I
337	Spirit	Nerpio	Castilla-La Mancha	Albacete	2007-02-11	5	IB
338	Fruit spirit	Nerpio	Castilla-La Mancha	Albacete	2007-02-11	1	IB
339	Cantueso	Agost	Com. Valenciana	Alicante	2007-02-15	1	I
340	Absinthe	Agost	Com. Valenciana	Alicante	2007-02-15	1	I
341	Fruit spirit	Agost	Com. Valenciana	Alicante	2007-02-15	1	I
342	Gitam	Herbés	Com. Valenciana	Castellón	2007-04-16	1	IB
343	Spirit	Herbés	Com. Valenciana	Castellón	2007-04-16	1	IB
344	Spirit	Herbés	Com. Valenciana	Castellón	2007-04-16	1	IB
345	Honey spirit	Herbés	Com. Valenciana	Castellón	2007-04-16	1	IB
346	Salvieta	Alcoi	Com. Valenciana	Alicante	2010-05-28	1	I
347	Herbal spirit	Farena	Cataluña	Tarragona	2010-06-20	1	IB
348	Herbal spirit	Farena	Cataluña	Tarragona	2010-06-20	1	IB
349	Fruit spirit	Farena	Cataluña	Tarragona	2010-06-20	2	IB
350	Fruit spirit	Farena	Cataluña	Tarragona	2010-06-20	1	IB
351	Herbal spirit	Farena	Cataluña	Tarragona	2010-06-20	1	IB
352	Fruit spirit	Farena	Cataluña	Tarragona	2010-06-20	1	IB
353	Fruit spirit	Farena	Cataluña	Tarragona	2010-06-20	1	IB
354	Herbal spirit	Farena	Cataluña	Tarragona	2010-06-20	1	IB
355	Walnut wine	Farena	Cataluña	Tarragona	2010-06-20	1	I
356	Absinthe	Farena	Cataluña	Tarragona	2010-06-20	1	I
357	Herbero	Bocairent	Com. Valenciana	Valencia	2007-03-15	8	B
358	Cucumber spirit	Toledo	Castilla-La Mancha	Toledo	2009-05-23	1	IB
359	Salvieta	Cocentaina	Com. Valenciana	Alicante	2010-07-03	1	I
360	Herbero	Margarida	Com. Valenciana	Alicante	2010-07-03	5	I
361	Cucumber spirit	Alcalà de la Jovada	Com. Valenciana	Alicante	2010-07-07	1	IB
362	Gitam	Corbera	Com. Valenciana	Valencia	2010-07-09	1	IB
363	Gitam	Tibi	Com. Valenciana	Alicante	2010-09-30	1	IB
364	Walnut wine	Yecla	Reg. Murcia	Murcia	2010-05-29	4	I
365	Honey spirit	Yecla	Reg. Murcia	Murcia	2010-05-29	1	I
366	Cantueso	Yecla	Reg. Murcia	Murcia	2010-05-29	1	I
367	Cantueso	Yecla	Reg. Murcia	Murcia	2010-05-29	1	I
368	Cantueso	Yecla	Reg. Murcia	Murcia	2010-05-29	1	I
369	Cucumber spirit	Manzanares	Castilla-La Mancha	Ciudad Real	2010-10-23	1	I
370	Fruit spirit	Manzanares	Castilla-La Mancha	Ciudad Real	2010-10-23	1	I
371	Fruit spirit	Valdecabras	Castilla-La Mancha	Cuenca	2010-10-31	1	IB
372	Fruit spirit	Valdecabras	Castilla-La Mancha	Cuenca	2010-10-31	1	IB
373	Fruit spirit	Valdecabras	Castilla-La Mancha	Cuenca	2010-10-31	2	IB
374	Mushroom spirit	Valdecabras	Castilla-La Mancha	Cuenca	2010-10-31	1	IB
375	Resoli	Valdecabras	Castilla-La Mancha	Cuenca	2010-10-31	4	IB
376	Gitam	La Portellada	Aragón	Teruel	2010-11-13	1	I
377	Gitam	Prat del Comte	Cataluña	Tarragona	2010-12-08	1	I
378	Herbal spirit	Banyeres de Mariola	Com. Valenciana	Alicante	2011-01-28	1	IB
379	Absinthe	Banyeres de Mariola	Com. Valenciana	Alicante	2011-01-28	1	IB
380	Fruit Spirit	Banyeres de Mariola	Com. Valenciana	Alicante	2011-01-28	1	IB
381	Ratafia	Figueres	Cataluña	Girona	2011-07-02	43	IB
382	Ratafia	Figueres	Cataluña	Girona	2011-07-02	48	IB
383	Fruit Spirit	Costur	Com. Valenciana	Castellón	2013-03-18	1	I
384	Spirit	Llucena del Cid	Com. Valenciana	Castellón	2013-03-18	1	I
385	Wine	Llucena del Cid	Com. Valenciana	Castellón	2013-03-18	1	I
386	Fruit Spirit	Llucena del Cid	Com. Valenciana	Castellón	2013-03-18	4	I
387	Fruit spirit	Llucena del Cid	Com. Valenciana	Castellón	2013-03-18	5	I
388	Herbero	Beneixama	Com. Valenciana	Alicante	2011-06-21	11	IB
389	Fruit spirit	Beneixama	Com. Valenciana	Alicante	2011-06-21	3	I
390	Fruit Spirit	Beneixama	Com. Valenciana	Alicante	2011-06-21	2	I
391	Herbero	Bocairent	Com. Valenciana	Valencia	2011-07-05	13	IB
392	Herbero	Bocairent	Com. Valenciana	Valencia	2011-07-05	11	I
393	Herbero	Bocairent	Com. Valenciana	Valencia	2011-07-05	13	I
394	Walnut wine	Vallderroures	Aragón	Teruel	2011-06-04	1	IB
395	Beatamaria	Vallderroures	Aragón	Teruel	2011-06-04	1	I
396	Gitam	Vallderroures	Aragón	Teruel	2011-06-04	1	I
397	Herbal Spirit	La Foia	Com. Valenciana	Castellón	2011-06-09	2	I
398	Fruit Spirit	La Foia	Com. Valenciana	Castellón	2011-06-09	1	I
399	Fruit Spirit	Torre del Comte	Aragón	Teruel	2011-04-25	1	I
400	Spirit	Torre del Comte	Aragón	Teruel	2011-04-25	1	I
401	Fruit Spirit	Torre del Comte	Aragón	Teruel	2011-04-25	1	I
402	Walnut wine	Torre del Comte	Aragón	Teruel	2011-04-25	2	I
403	Honey spirit	Vegas de Coria	Extremadura	Cáceres	2011-06-06	5	IB
404	Herbero	Alcoi	Com. Valenciana	Alicante	2007-04-06	5	B
405	Herbero	Beneixama	Com. Valenciana	Alicante	2007-02-16	9	B
406	Herbero	Ibi	Com. Valenciana	Alicante	2007-02-09	9	B
407	Herbero	Alcoi	Com. Valenciana	Alicante	2007-04-06	6	B
408	Herbero	Ibi	Com. Valenciana	Alicante	2010-07-12	11	B
409	Herbero	Alfafara	Com. Valenciana	Alicante	2005-06-09	5	B
410	Vermouth	Ibi	Com. Valenciana	Alicante	2010-06-14	1	B
411	Herbero	Bocairent	Com. Valenciana	Valencia	2008-09-25	6	B
412	Cantueso	Ibi	Com. Valenciana	Alicante	2010-06-14	2	B
413	Herbero	Ibi	Com. Valenciana	Alicante	2010-06-14	8	B
414	Herbero	Ibi	Com. Valenciana	Alicante	2010-07-12	5	B
415	Herbero	Herbés	Com. Valenciana	Castellón	2009-04-18	19	B
416	Herbero	Alcoi	Com. Valenciana	Alicante	2007-07-12	7	B
417	Herbero	Agres	Com. Valenciana	Alicante	2007-06-20	9	B
418	Herbero	Sant Joan de Labritja	Baleares	Ibiza	2009-12-18	5	B
419	Herbero	Sant Francesc de Formentera	Baleares	Formentera	2008-08-10	13	B
420	Herbero	Ibiza	Baleares	Ibiza	2008-12-18	11	B
421	Herbero	Ibiza	Baleares	Ibiza	2008-12-18	4	B
422	Herbero	Banyeres de Mariola	Com. Valenciana	Alicante	2013-05-25	9	B
423	Herbero	Selva	Baleares	Mallorca	2008-05-04	6	B
424	Herbal spirit	Banyeres de Mariola	Com. Valenciana	Alicante	2015-06-01	1	B
425	Herbero	Cocentaina	Com. Valenciana	Alicante	2011-06-26	12	B
426	Herbero	Ibi	Com. Valenciana	Alicante	2017-06-03	13	B
427	Herbero	Ibi	Com. Valenciana	Alicante	2017-06-03	8	B
428	Herbero	Ibi	Com. Valenciana	Alicante	2017-06-03	9	B
429	Herbero	Alcoi	Com. Valenciana	Alicante	2017-06-03	15	B
430	Herbero	Alcoi	Com. Valenciana	Alicante	2017-06-03	12	B
431	Herbero	Elda	Com. Valenciana	Alicante	2017-06-03	11	B
432	Fruit spirit	Ibi	Com. Valenciana	Alicante	2015-06-01	3	B
433	Herbero	Castalla	Com. Valenciana	Alicante	2017-06-03	4	B
434	Herbero	Ibi	Com. Valenciana	Alicante	2017-04-04	6	B
435	Salvieta	Banyeres de Mariola	Com. Valenciana	Alicante	2017-04-05	1	B
436	Herbero	Alcoi	Com. Valenciana	Alicante	2017-06-03	4	B
437	Salvieta	Cocentaina	Com. Valenciana	Alicante	2011-06-26	1	B
438	Herbero	Banyeres de Mariola	Com. Valenciana	Alicante	2017-06-03	13	B
439	Salvieta	Alcoi	Com. Valenciana	Alicante	2017-06-03	1	B
440	Resoli	Zarzuela	Castilla-La Mancha	Cuenca	2018-01-22	7	I
441	Resoli	Cuenca	Castilla-La Mancha	Cuenca	2010-10-31	8	B
442	Gitam	Vallderroures	Aragón	Teruel	2010-06-19	1	B
443	Fruit spirit	Alcoi	Com. Valenciana	Alicante	2007-06-09	6	B
444	Beatamaria	Vallderroures	Aragón	Teruel	2010-06-19	1	B
445	Walnut wine	Ibi	Com. Valenciana	Alicante	2014-09-18	1	B
446	Walnut wine	Ibi	Com. Valenciana	Alicante	2010-05-25	2	B
447	Fruit spirit	Banyeres de Mariola	Com. Valenciana	Alicante	2007-05-01	1	B
448	Fruit spirit	Ibi	Com. Valenciana	Alicante	2010-05-25	3	B
449	Herbal spirit	Yeste	Castilla-La Mancha	Albacete	2010-06-30	1	B
450	Fruit spirit	Herbés	Com. Valenciana	Castellón	2007-08-14	3	B
451	Beatamaria	Horta de Sant Joan	Cataluña	Tarragona	2007-04-18	1	B
452	Walnut wine	Herbés	Com. Valenciana	Castellón	2007-08-14	3	B
453	Cantueso	Ibi	Com. Valenciana	Alicante	2010-05-25	1	B
454	Ratafia	Vall d'Aran	Cataluña	Lleida	2012-03-05	2	B
455	Vermouth	Ibi	Com. Valenciana	Alicante	2010-05-25	2	B
456	Fruit spirit	Bocairent	Com. Valenciana	Valencia	2007-07-02	1	B
457	Cucumber spirit	Ibi	Com. Valenciana	Alicante	2007-02-09	1	B
458	Walnut wine	Cocentaina	Com. Valenciana	Alicante	2007-06-04	1	B
459	Gitam	Herbés	Com. Valenciana	Castellón	2007-08-14	1	B
460	Spirit	Aielo de Malferit	Com. Valenciana	Valencia	2007-06-22	1	B
461	Herbero	Sella	Com. Valenciana	Alicante	2007-05-27	7	IB
462	Herbero	Abdet	Com. Valenciana	Alicante	2005-06-05	14	IB
463	Herbero	Abdet	Com. Valenciana	Alicante	2005-06-05	12	I
464	Herbero	Penàguila	Com. Valenciana	Alicante	2005-06-05	6	I
465	Herbero	Agullent	Com. Valenciana	Valencia	2006-01-19	9	IB
466	Herbero	Alcoi	Com. Valenciana	Alicante	2005-06-05	5	IB
467	Herbero	Alcoi	Com. Valenciana	Alicante	2005-06-05	11	IB
468	Herbero	Alcoi	Com. Valenciana	Alicante	2005-06-05	12	IB
469	Herbero	Cocentaina	Com. Valenciana	Alicante	2005-06-05	7	IB
470	Herbero	Cocentaina	Com. Valenciana	Alicante	2005-06-05	5	IB
471	Herbero	Cocentaina	Com. Valenciana	Alicante	2005-06-05	13	IB
472	Herbero	Cocentaina	Com. Valenciana	Alicante	2005-06-05	28	I
473	Herbero	Benissili	Com. Valenciana	Alicante	2005-06-06	5	IB
474	Herbero	Ibi	Com. Valenciana	Alicante	2005-06-07	5	IB
475	Herbero	Castalla	Com. Valenciana	Alicante	2005-06-08	5	IB
476	Herbero	Alfafara	Com. Valenciana	Alicante	2005-06-09	11	IB
477	Herbero	Alfafara	Com. Valenciana	Alicante	2005-06-09	10	IB
478	Fruit spirit	Barranda	Reg. Murcia	Murcia	2008-03-10	1	I
479	Spirit	Barranda	Reg. Murcia	Murcia	2008-03-10	4	I
480	Fruit spirit	Barranda	Reg. Murcia	Murcia	2008-03-10	1	I
481	Fruit spirit	Barranda	Reg. Murcia	Murcia	2008-03-10	4	I
482	Walnut wine	Barranda	Reg. Murcia	Murcia	2008-03-10	1	I
483	Walnut wine	Nerpio	Castilla-La Mancha	Albacete	2008-03-10	1	I
484	Salvieta	Banyeres de Mariola	Com. Valenciana	Alicante	2007-06-24	1	I
485	Herbero	Banyeres de Mariola	Com. Valenciana	Alicante	2007-06-24	13	I
486	Herbero	Banyeres de Mariola	Com. Valenciana	Alicante	2007-06-24	15	I
487	Walnut wine	Ferreruela de Huerva	Aragón	Teruel	2007-01-20	1	IB
488	Fruit spirit	Ferreruela de Huerva	Aragón	Teruel	2007-01-20	1	I
489	Fruit spirit	Ferreruela de Huerva	Aragón	Teruel	2007-01-20	3	I
490	Cucumber spirit	Ferreruela de Huerva	Aragón	Teruel	2007-01-20	1	I
491	Herbero	Elda	Com. Valenciana	Alicante	2007-06-05	8	I
492	Herbero	Elda	Com. Valenciana	Alicante	2007-06-05	9	I
493	Absinthe	Xert	Com. Valenciana	Castellón	2007-07-29	2	IB
494	Herbal Spirit	Xert	Com. Valenciana	Castellón	2007-07-29	1	IB
495	Fruit spirit	Xert	Com. Valenciana	Castellón	2007-07-29	1	IB
496	Herbero	Relleu	Com. Valenciana	Alicante	2017-07-09	3	B
497	Benedictine Spirit	Alcoi	Com. Valenciana	Alicante	2007-10-10	9	I
498	Herbero	Bocairent	Com. Valenciana	Valencia	2008-09-25	7	I
499	Fruit spirit	Bocairent	Com. Valenciana	Valencia	2008-09-25	2	I
500	Herbero	Bocairent	Com. Valenciana	Valencia	2009-03-10	13	I
501	Herbero	Elx	Com. Valenciana	Alicante	2007-05-07		I
502	Herbero	Banyeres de Mariola	Com. Valenciana	Alicante	2005-06-29	27	I
503	Herbero	Cocentaina	Com. Valenciana	Alicante	2005-07-05	9	IB
504	Herbero	Cocentaina	Com. Valenciana	Alicante	2005-07-05	10	IB
505*	Others	Alfondeguilla	Com. Valenciana	Castellón	2007-08-09	7	I
506	Herbal wine	Amposta	Cataluña	Tarragona	2010-06-18	4	I
507	Fruit Spirit	Gavarres	Cataluña	Girona	2010-06-18	4	I
508	Ratafia	Gavarres	Cataluña	Girona	2010-06-18	4	I
509	Fruit spirit	Rozas de Puerto Real	Madrid	Madrid	2010-06-18	1	I
510	Herbal wine	Sant Feliu de Guixols	Cataluña	Girona	2010-06-18	1	I
511	Fruit Spirit	Crevillent	Com. Valenciana	Alicante	2010-06-18	2	I
512	Fruit Spirit	Alacant	Com. Valenciana	Alicante	2010-06-18	1	I
513	Fruit Spirit	Xixona	Com. Valenciana	Alicante	2010-06-18	1	I
514	Fruit spirit	Beniarrés	Com. Valenciana	Alicante	2010-06-18	1	I
515	Fruit wine	Xixona	Com. Valenciana	Alicante	2010-06-18	2	I
516	Walnut wine	Castalla	Com. Valenciana	Alicante	2010-06-18	1	I
517	Cucumber spirit	Xixona	Com. Valenciana	Alicante	2010-06-18	1	I
518	Fruit Spirit	Camprodon, Alta Vall del Ter	Cataluña	Girona	2010-06-18	3	I
519	Spirit	Camprodon, Alta Vall del Ter	Cataluña	Girona	2010-06-18	1	1
520	Fruit spirit	Camprodon, Alta Vall del Ter	Cataluña	Girona	2010-06-18	1	1
521	Herbal wine	Camprodon, Alta Vall del Ter	Cataluña	Girona	2010-06-18	1	1
522	Fruit wine	Camprodon, Alta Vall del Ter	Cataluña	Girona	2010-06-18	2	1
523	Herbal wine	Camprodon, Alta Vall del Ter	Cataluña	Girona	2010-06-18	1	1
524	Fruit wine	Camprodon, Alta Vall del Ter	Cataluña	Girona	2010-06-18	3	1
525	Herbal wine	Camprodon, Alta Vall del Ter	Cataluña	Girona	2010-06-18	1	1
526	Spirit	Camprodon, Alta Vall del Ter	Cataluña	Girona	2010-06-18	1	1
527	Spirit	Bocairent	Com. Valenciana	Valencia		1	I
528	Herbal spirit	Vil·lajoiosa	Com. Valenciana	Alicante	2010-06-18	2	I
529	Beatamaria	Arnes	Cataluña	Tarragona	2010-06-19	1	I
530	Herbero	Arnes	Cataluña	Tarragona	2010-06-19	3	I
531	Beatamaria	Arnes	Cataluña	Tarragona	2010-06-19	2	I
532	Gitam	Fredes	Com. Valenciana	Castellón	2010-06-19	1	I
533	Fruit Spirit	Amposta	Cataluña	Tarragona	2010-06-19	3	I
534	Beatamaria	Amposta	Cataluña	Tarragona	2010-06-19	1	IB
535	Ratafia	Sant Julià de Lòria (Andorra)	Andorra	Andorra	2010-07-28	18	I
536	Ratafia	Sant Julià de Lòria (Andorra)	Andorra	Andorra	2010-07-28	13	I
537	Ratafia	Sant Julià de Lòria (Andorra)	Andorra	Andorra	2010-07-28	26	I
538	Walnut wine	Agullent	Com. Valenciana	Valencia	2006-01-19	2	IB
539	Fruit spirit	Agullent	Com. Valenciana	Valencia	2006-01-19	1	IB
540	Herbero	Agullent	Com. Valenciana	Valencia	2006-01-19	7	IB
541	Herbero	Ibi	Com. Valenciana	Alicante	2006-06-05	7	I
542	Herbero	Ibi	Com. Valenciana	Alicante	2006-06-05	12	I
543	Herbero	Ibi	Com. Valenciana	Alicante	2006-06-05	1	I
544	Herbero	Bocairent	Com. Valenciana	Valencia	2006-05-31	9	IB
545	Herbero	Bocairent	Com. Valenciana	Valencia	2006-05-31	9	IB
546	Salvieta	Alfafara	Com. Valenciana	Alicante	2009-12-03	1	I
547	Fruit spirit	Guadalajara	Castilla-La Mancha	Guadalajara	2010-03-03	1	I
548	Fruit spirit	Guadalajara	Castilla-La Mancha	Guadalajara	2010-03-03	1	I
549	Cucumber spirit	Guadalajara	Castilla-La Mancha	Guadalajara	2010-03-03	1	I
550	Fruit spirit	Guadalajara	Castilla-La Mancha	Guadalajara	2010-03-03	3	I
551	Herbero	Alcoi	Com. Valenciana	Alicante	2007-07-12	11	I
552	Herbero	Alcoi	Com. Valenciana	Alicante	2007-07-12	11	I
553	Herbero	Alcoi	Com. Valenciana	Alicante	2007-07-12	11	I
554	Herbero	Alcoi	Com. Valenciana	Alicante	2007-07-12	11	I
555	Herbero	Alcoi	Com. Valenciana	Alicante	2007-07-09	12	IB
556	Herbero	Alcoi	Com. Valenciana	Alicante	2007-07-09	16	IB
557	Fruit wine	Maó	Baleares	Menorca	2005-02-10	3	I
558	Herbal spirit	Maó	Baleares	Menorca	2005-02-10	2	I
559	Herbal spirit	Maó	Baleares	Menorca	2005-02-10	3	I
560	Fruit Spirit	Maó	Baleares	Menorca	2005-02-10	1	I
561	Herbero	Cocentaina	Com. Valenciana	Alicante	2007-06-09	7	I
562	Herbero	Cocentaina	Com. Valenciana	Alicante	2007-06-09	10	I
563	Wine	Cocentaina	Com. Valenciana	Alicante	2007-06-09	1	I
564	Fruit spirit	Fageca	Com. Valenciana	Alicante	2007-05-26	1	I
565	Spirit	La Torre de les Maçanes	Com. Valenciana	Alicante	2007-06-03	1	I
566	Fruit Spirit	La Torre de les Maçanes	Com. Valenciana	Alicante	2007-06-03	1	I
567	Absinthe	Tàrbena	Com. Valenciana	Alicante	2007-05-26	2	I
568	Salvieta	Muro d'Alcoi	Com. Valenciana	Alicante	2007-06-02	1	I
569	Fruit wine	Sant Carles de la Ràpita	Cataluña	Tarragona	2009-12-18	1	I
